# Supplementary material for: A new tandem peptide modified liposomal doxorubicin for tumor “ecological therapy”
Source: Royal Society of Chemistry journal article supplement (doi:10.1039/c9nr09585c), 2020-01-01
Supplement: c9nr09585c1.pdf [file c9nr09585c1.pdf]

## A new tandem peptide modified liposomal doxorubicin for tumor “ecological therapy”

Ting Zhao, Hongli Zhou, Lei Lei, Chenqi Guo, Qin Yang, Ting Gong, Xun Sun, Song Xu\*, Gong Tao  
\*, Zhirong Zhang

### Supplementary Information

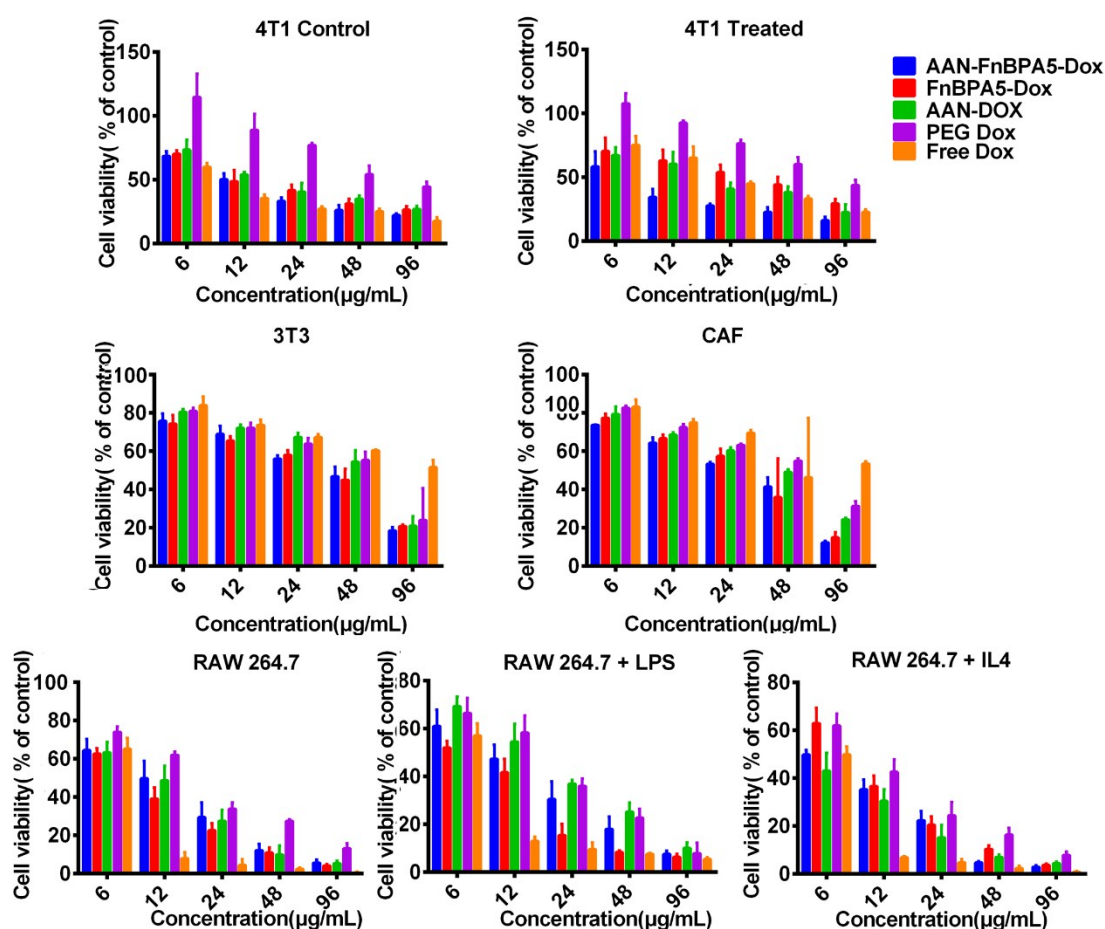

Fig. S1 Cell viability of AAN-FnBPA5-Dox, FnBPA5-Dox, AAN-Dox, PEG Dox and Free Dox for 24 h.

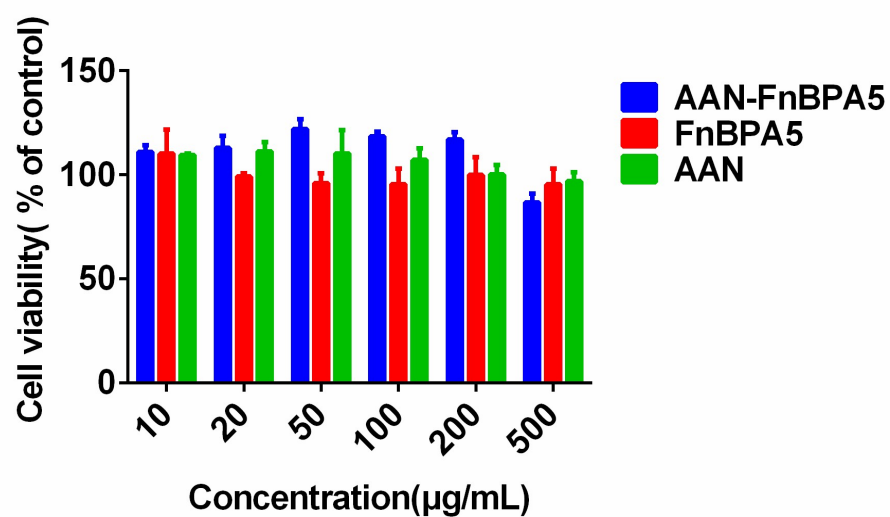

Fig. S2. Cell viability of AAN-FnBPA5, FnBPA5, AAN for 24 h.

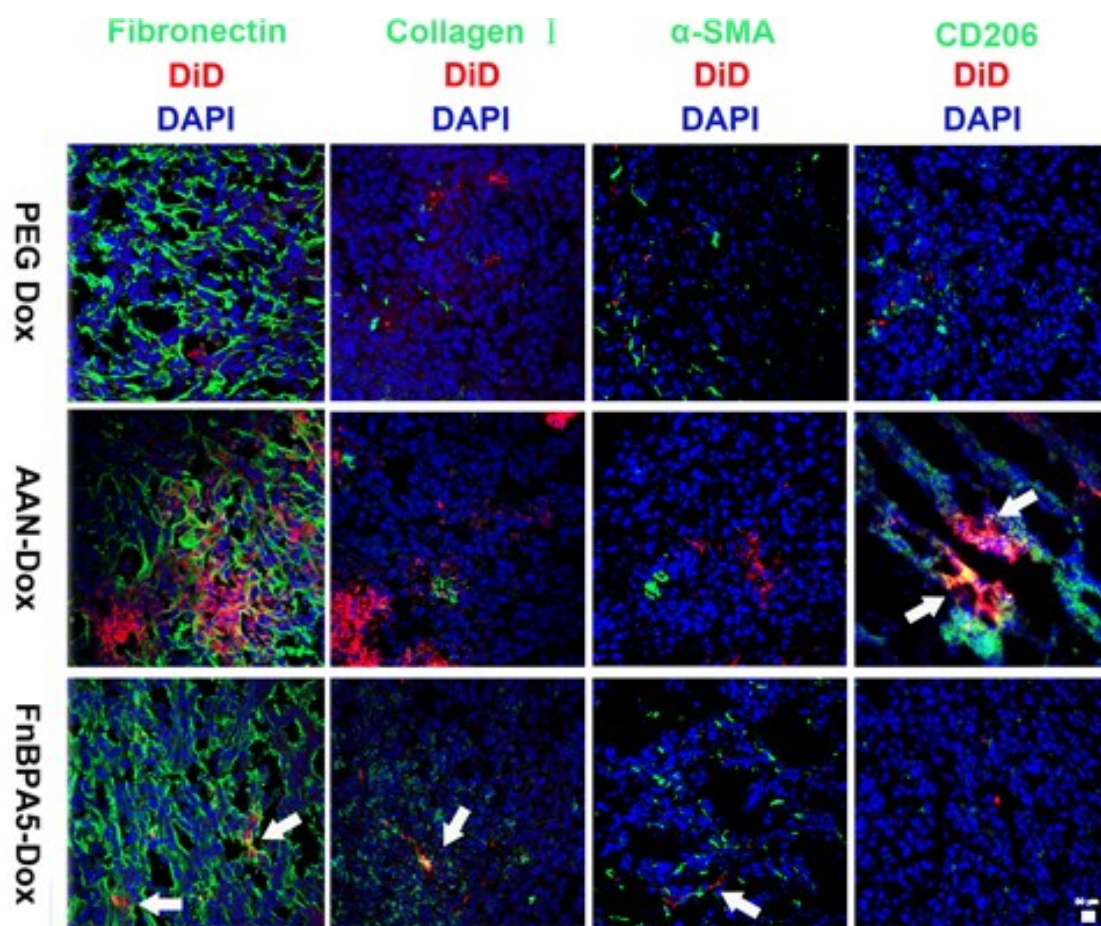

Fig.S3. Fibronectin and collagen I were stained by corresponding antibodies (green) in FnBPA5-Dox, AAN-Dox and PEG Dox groups. CAFs were stained by  $\alpha$ -SMA (green) and M2 macrophages were stained by CD206 (green). The different co-location was marked (yellow). Cell nuclei were labeled by DAPI (blue). Scale bar = 20  $\mu$ m.

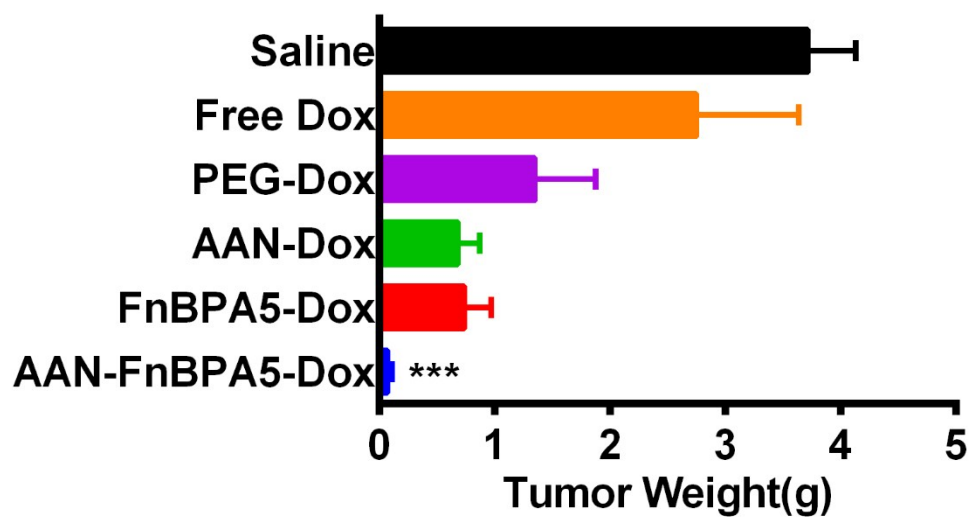

Fig. S4. Average tumor weight after treatment in liposomes and Free Dox. (n = 5, mean  $\pm$  SD, \*\*\*p < 0.001)

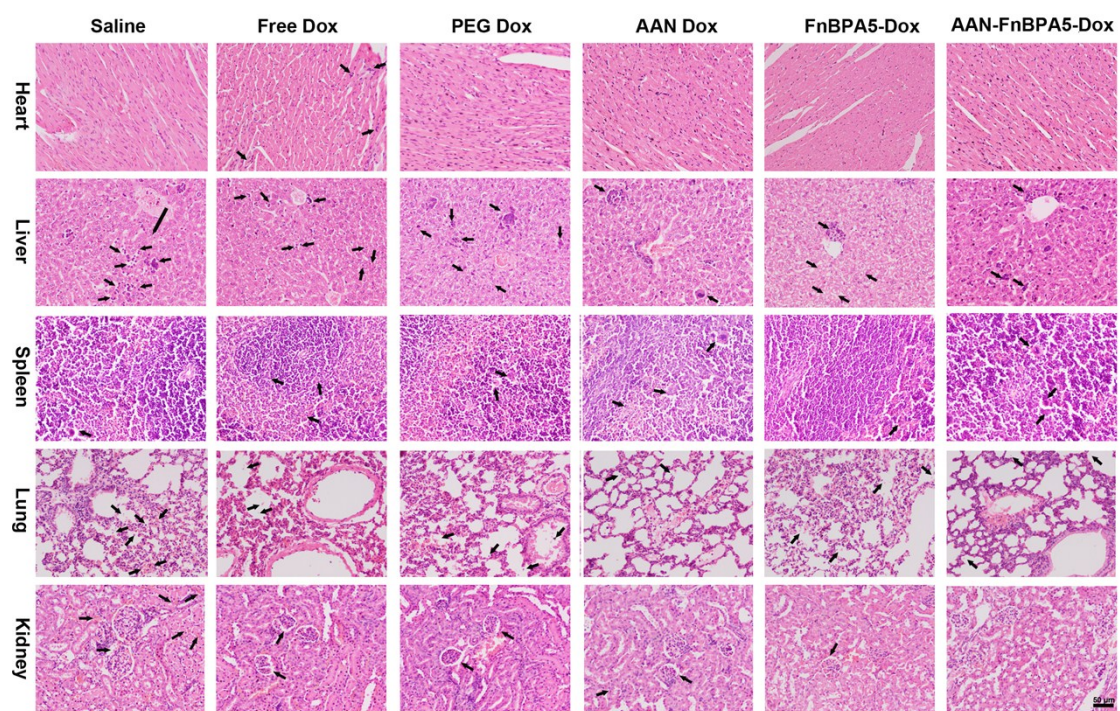

Fig. S5. Safety evaluation of drug-loaded liposomes in major organs. H&E with magnification of 200  $\times$ , scale bar = 50  $\mu$ m
